# Supplementary figures and images for: Dido gene expression alterations are implicated in the induction of hematological myeloid neoplasms
Source: JCI journal article supplement (doi:10.1172/jci24177), 2005-08-26

# supplementary Figure 1

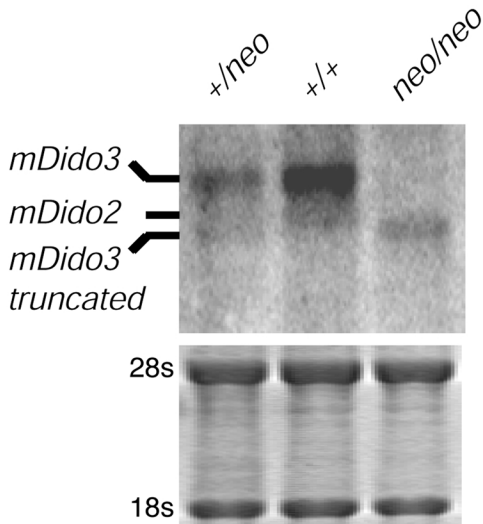

Northern of mouse BM , both +/neo and neo/neo mouse were diseased

Supplement: sd1 [file 1]
